# Supplementary material for: Enhanced water flux in vertically aligned carbon nanotube arrays and polyethersulfone composite membranes
Source: Royal Society of Chemistry journal article supplement (doi:10.1039/c4ta02119c), 2014-01-01
Supplement: c4ta02119c1.pdf [file c4ta02119c1.pdf]

## Supporting information

### Evaluation of membrane performance

Permeation fluxes of membranes were obtained as follows:

$$F=V/(S\times t) \quad (1)$$

where  $F$  is the permeation flux of membrane ( $L/(m^2 h)$ ),  $V$  is the volumetric flow rate of permeate (L),  $S$  is the active area of membrane ( $m^2$ ), and  $t$  is the time (h).

PEG-20000 rejection of membrane was defined as:

$$R(\%)=(1-C_2/C_1)\times 100 \quad (2)$$

where  $R$  is the PEG-20000 rejection, and  $C_1$ ,  $C_2$  represent PEG-20000 concentrations in the feed and permeate, respectively. The  $C_1$  and  $C_2$  were determined through the absorbance at 510 nm after iodine staining, which has been pre-calibrated as shown in fig. S6.

### Volume fraction of CNTs inside the composite membrane

Based on the SEM images we estimated the density of the CNT array around  $1\times 10^{10} \pm 5\times 10^9 \text{ cm}^{-2}$ . Therefore the volume fraction of CNT array in the membrane is calculated to be  $1.8\% \pm 0.9\%$ . ( $\text{CNT}\% = 1\times 10^{10} \times 3.14 \times R_{\text{CNT}}^2$ )

### Porosity measurement

The membrane maintained in distilled water was weighed after mopping superficial water with filter paper. Then the wet membrane was placed in an air-circulating oven at  $60^\circ\text{C}$  for 24 h and then further dried in a vacuum oven at  $80^\circ\text{C}$  for 24 h before measuring the dry weight. From the two weights (wet sample weight and dry sample weight), the porosity of membrane was calculated using formula (3) as

$$P=(Q_2-Q_1)/\rho_{\text{AH}} \quad (3)$$

$P$  is the porosity of the PES membrane

$Q_2$  is the wet sample weight (g)

$Q_1$  is the dry sample weight (g)

$\rho$  is the density of water ( $\text{g}/\text{cm}^3$ )

$A$  is the surface of the membrane ( $\text{cm}^2$ )

$H$  is the thickness of the membrane (cm)

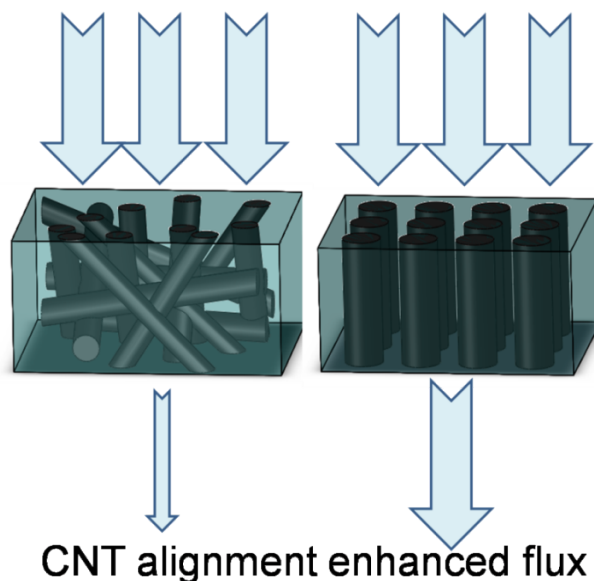

**Scheme S1** Schematic representation of the enhanced water transportation in different CNT blended membrane

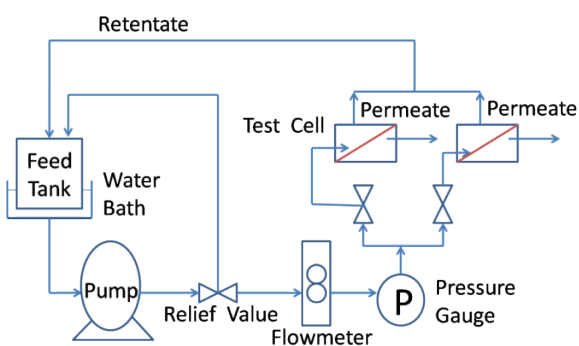

**Scheme S2** Schematic diagram of the device for the permeation tests.

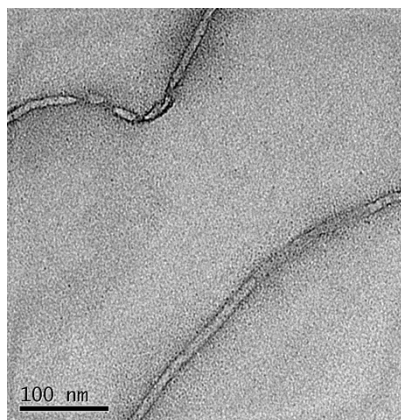

**Figure S1** TEM images of as-prepared CNTs through conventional CVD methods

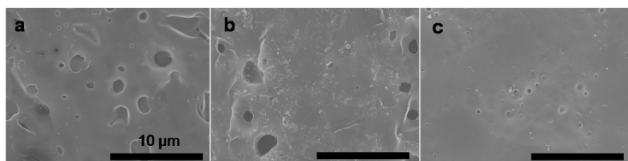

**Figure S2** SEM images of the surface morphology of three type of CNT/PES membranes: a) VA-CNT/PES, b) R-CNT/PES, c) Pure PES

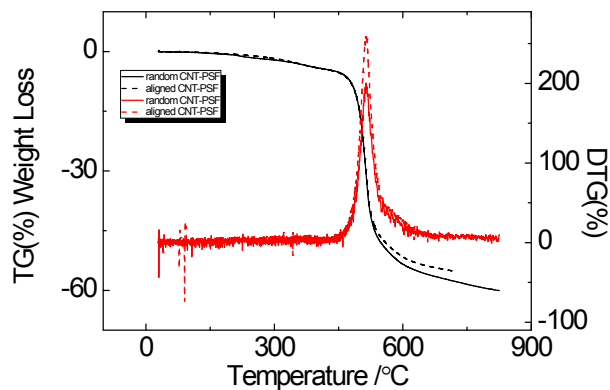

**Figure S3** TGA (black curves) and SDT (red curves) analysis of R-CNT/PES film (solid curve) and VA-CNT/PES film (sdot line)

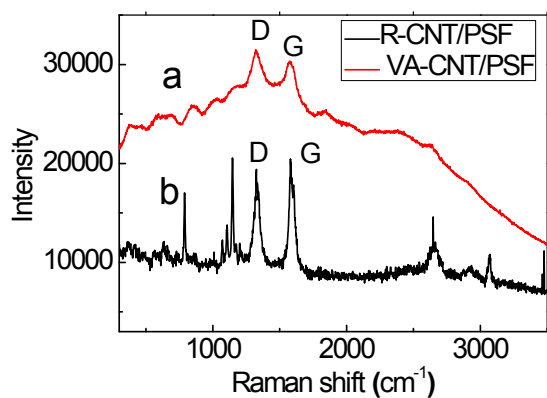

**Figure S4** Raman spectra of the blend membrane composed of VA-CNT/PES (a) and R-CNT/PES (b)

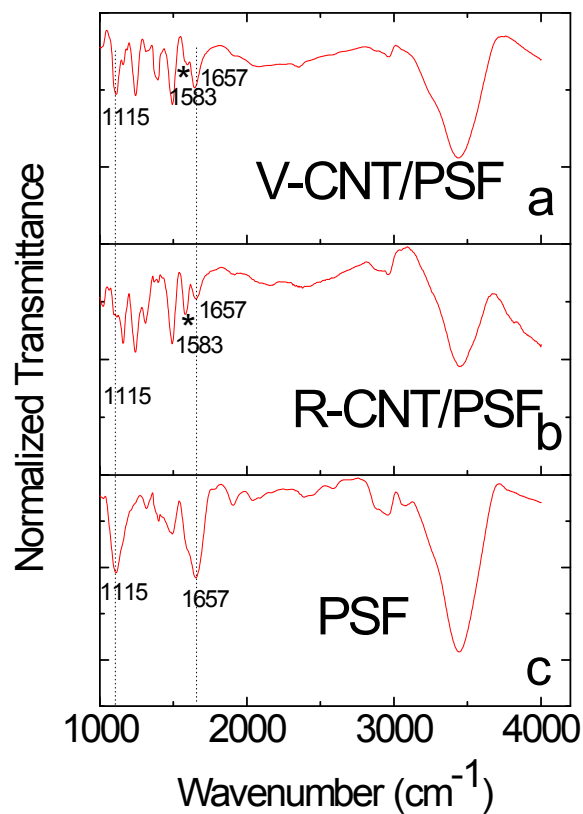

**Figure S5** FT-IR spectra of the blend membrane composed of (a) VA-CNT/PES, (b) R-CNT/PES and (c) pure PES film

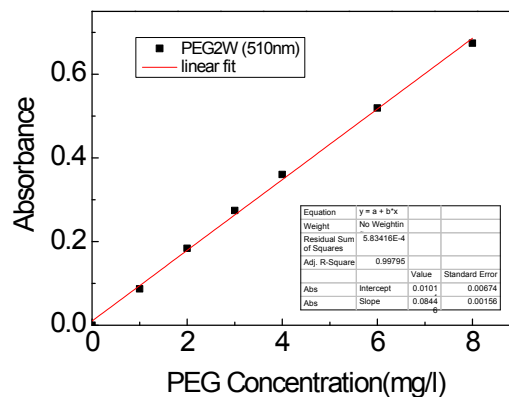

**Figure S6** Standard curves of PEG 20000 with the iodine staining
